# Supplementary material for: Transcript-Level Analysis of Molecular Alterations Associated With the Development of Premalignant Bronchial Lesions
Source: Preprints.org preprint supplement (doi:10.20944/preprints202404.1357.v1), 2024-04-19
Supplement: Supplementary file 1 [file supplementary]

## Sheet: hubs16
ENST	module_membership	ENSG	Description	Symbol	chr	ENTREZID	kMEyellow	dysplasia_status_cor	wald_qval
ENST00000355568.8	yellow	ENSG00000197168.14	NIMA related kinase 5 [Source:HGNC Symbol;Acc:HGNC:7748]	NEK5	13	341676	0.947161	0.231371	0.00593217
ENST00000372875.3	yellow	ENSG00000167113.11	coenzyme Q4 [Source:HGNC Symbol;Acc:HGNC:19693]	COQ4	9	51117	0.963625	0.282865	0.00718976
ENST00000382549.8	yellow	ENSG00000159079.19	cilia and flagella associated protein 298 [Source:HGNC Symbol;Acc:HGNC:1301]	CFAP298	21	56683	0.931419	0.253367	0.00495502
ENST00000395590.5	yellow	ENSG00000079974.19	RAB, member of RAS oncogene family like 2B [Source:HGNC Symbol;Acc:HGNC:9800]	RABL2B	22	11158	0.941844	0.249783	0.000669585
ENST00000414255.1	yellow	ENSG00000171295.13	zinc finger protein 440 [Source:HGNC Symbol;Acc:HGNC:20874]	ZNF440	19	126070	0.942077	0.244591	0.0380768
ENST00000420323.7	yellow	ENSG00000114841.18	dynein axonemal heavy chain 1 [Source:HGNC Symbol;Acc:HGNC:2940]	DNAH1	3	25981	0.943773	0.217005	0.0085339
ENST00000427120.6	yellow	ENSG00000114770.17	ATP binding cassette subfamily C member 5 [Source:HGNC Symbol;Acc:HGNC:56]	ABCC5	3	10057	0.947972	0.25069	0.00199671
ENST00000453254.5	yellow	ENSG00000114473.14	IQ motif containing G [Source:HGNC Symbol;Acc:HGNC:25251]	IQCG	3	84223	0.932163	0.274271	0.0117939
ENST00000524416.1	yellow	ENSG00000051009.11	FHF complex subunit HOOK interacting protein 1B [Source:HGNC Symbol;Acc:HGNC:25378]	FHIP1B	11	84067	0.969361	0.275635	0.00576986
ENST00000525458.1	yellow	ENSG00000166959.8	membrane spanning 4-domains A8 [Source:HGNC Symbol;Acc:HGNC:13380]	MS4A8	11	83661	0.944618	0.203895	0.00495502
ENST00000533099.5	yellow	ENSG00000185946.16	RNA binding region (RNP1, RRM) containing 3 [Source:HGNC Symbol;Acc:HGNC:18666]	RNPC3	1	55599	0.959346	0.267553	0.0207833
ENST00000558453.5	yellow	ENSG00000140395.9	SKI8 subunit of superkiller complex [Source:HGNC Symbol;Acc:HGNC:30300]	SKIC8	15	80349	0.934787	0.206999	0.00700999
ENST00000563389.1	yellow	ENSG00000175267.15	von Willebrand factor A domain containing 3A [Source:HGNC Symbol;Acc:HGNC:27088]	VWA3A	16	146177	0.936078	0.280618	0.00281847
ENST00000600377.1	yellow	ENSG00000064607.17	SURP and G-patch domain containing 2 [Source:HGNC Symbol;Acc:HGNC:18641]	SUGP2	19	10147	0.947736	0.234319	0.00192011
ENST00000635996.1	yellow	ENSG00000096093.16	EF-hand domain containing 1 [Source:HGNC Symbol;Acc:HGNC:16406]	EFHC1	6	114327	0.941251	0.23422	0.0289075
ENST00000663089.1	yellow	ENSG00000108641.20	B9 domain containing 1 [Source:HGNC Symbol;Acc:HGNC:24123]	B9D1	17	27077	0.940123	0.232297	0.00511205
