# Supplementary figures and images for: Transcript-Level Analysis of Molecular Alterations Associated With the Development of Premalignant Bronchial Lesions
Source: Preprints.org preprint supplement (doi:10.20944/preprints202404.1357.v1), 2024-04-19

### Scale independence

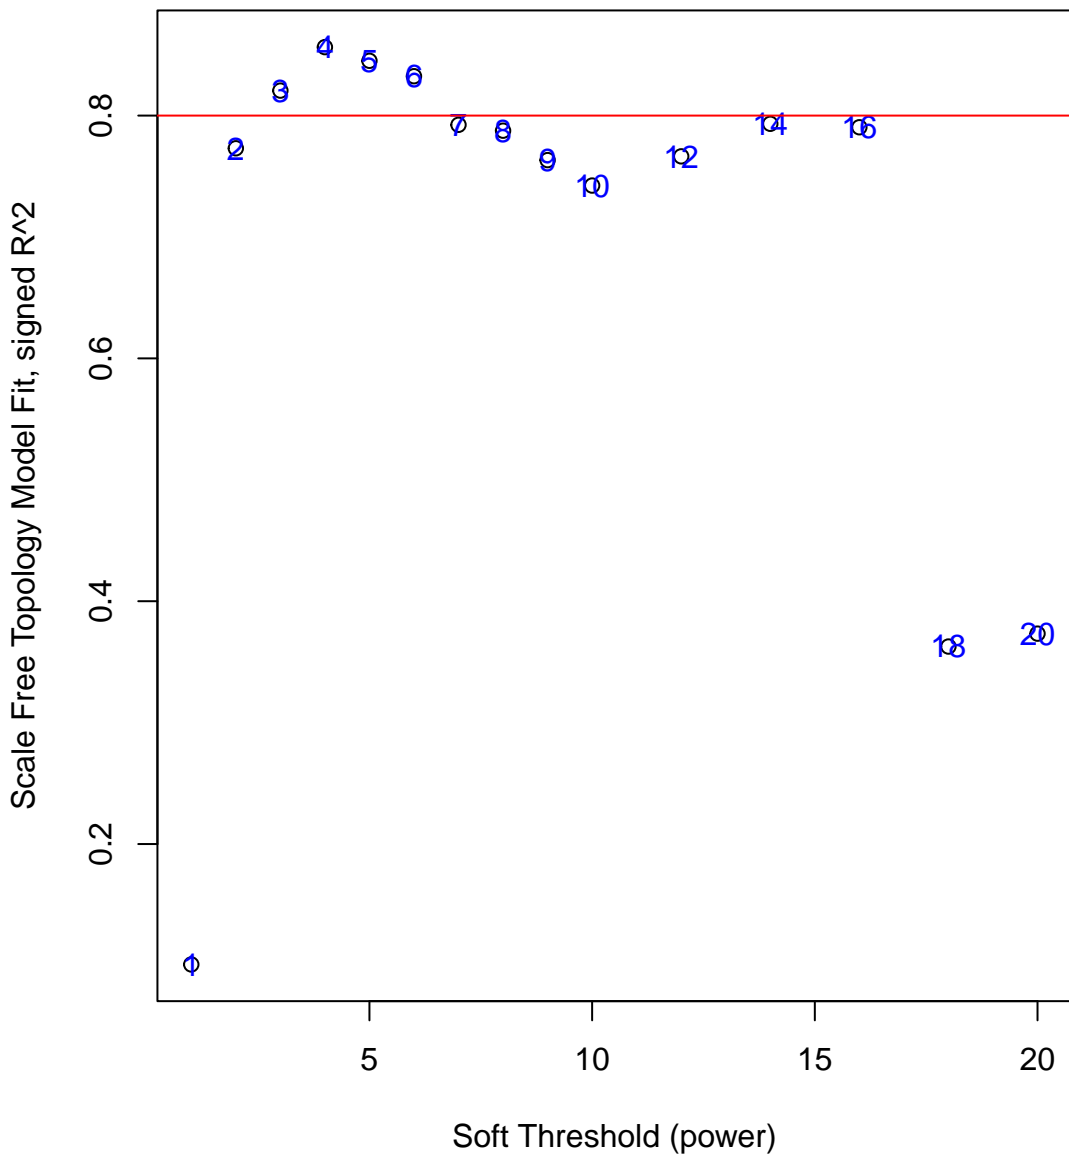

### Mean connectivity

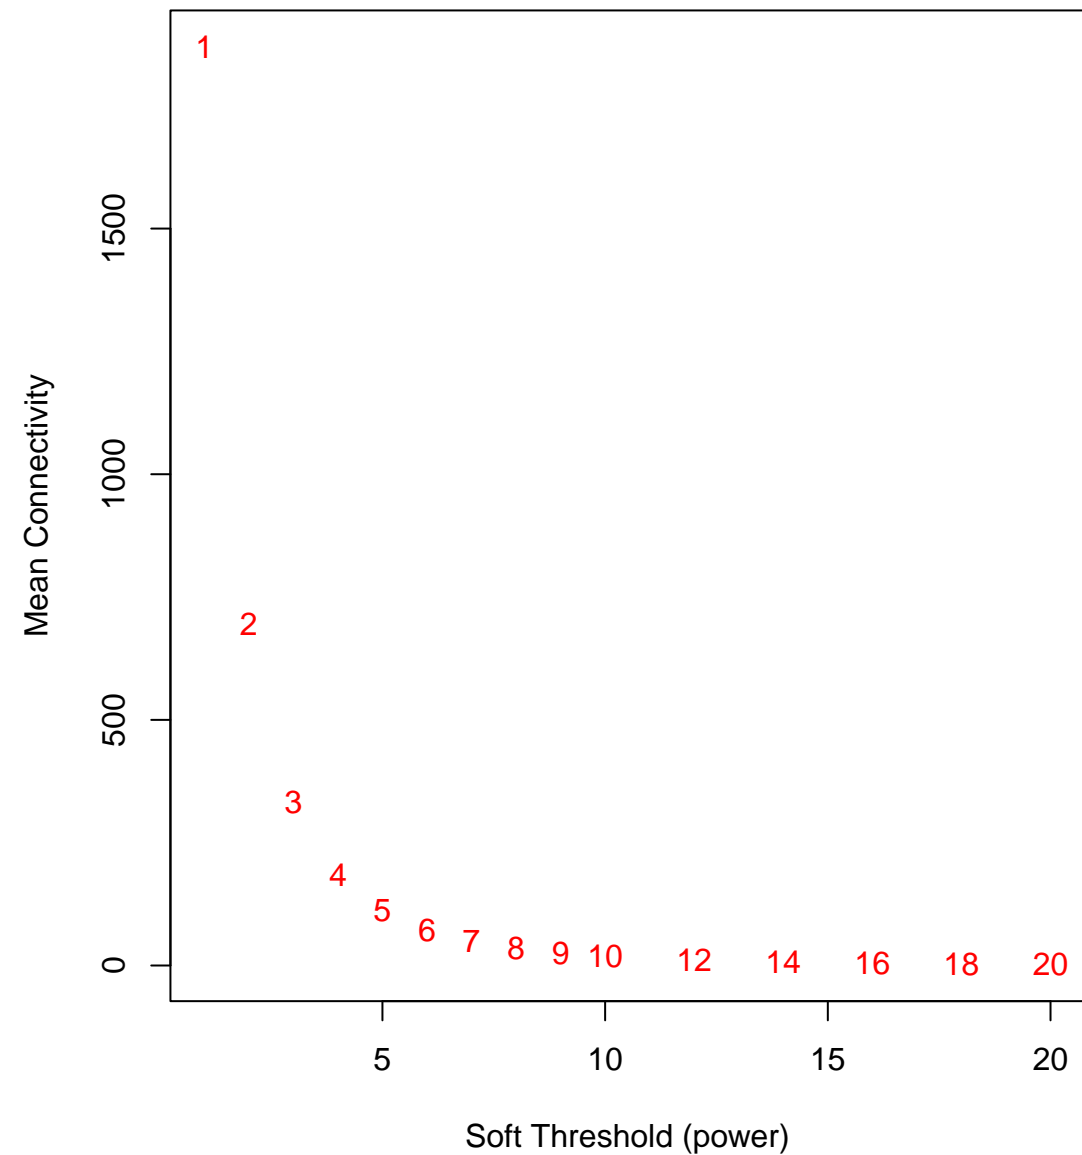

Supplement: Supplementary file 1 [file supplementary]
